# Supplementary material for: Structure and lipid dynamics in the A. baumannii maintenance of lipid asymmetry (MLA) inner membrane complex
Source: bioRxiv or medRxiv preprint supplement (doi:10.1101/2020.05.30.125013), 2020-11-12
Supplement: Supplementary file [file media-1.pdf]

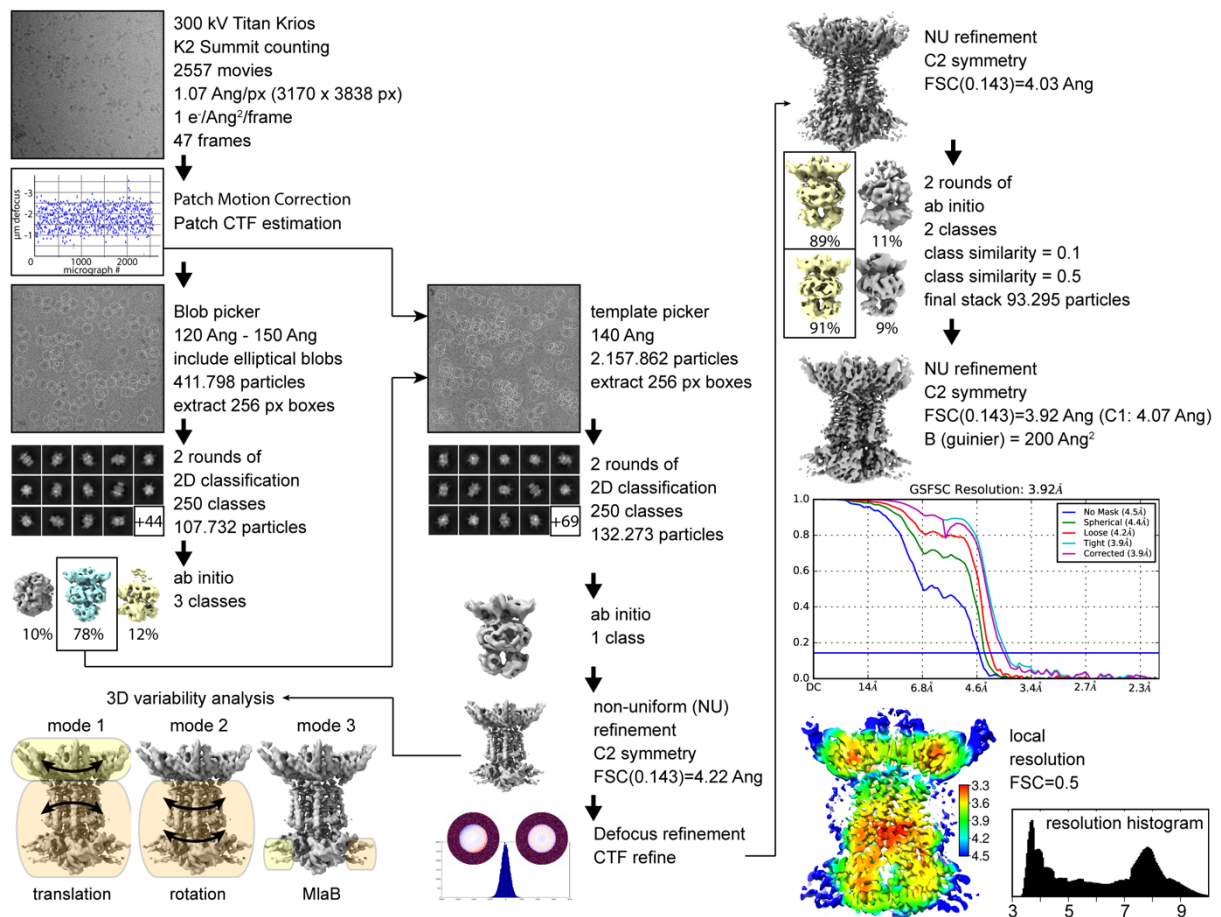

369

370 **Supplemental Figure 1:** processing of the MlaBDEF-AppNHp dataset. Patch motion  
 371 correction resulted in a detected defocus range of -1 to -2.5  $\mu\text{m}$ . Initial blob picking with a  
 372 diameter range from 120-150  $\text{\AA}$  including elliptical shapes were extracted and 2D classified  
 373 two times into each 250 classes. Ab initio 3D models were generated and the best class was  
 374 used to re-pick particles template-based. After two rounds of 2D classification an ab initio 3D  
 375 model was generated and refined using CryoSPARC's Non-Uniform (NU) refinement  
 376 procedure with C2 symmetry, followed by global and local CTF refinement and two rounds of  
 377 ab initio model generation with class similarity values of 0.1 and 0.5, respectively. The final  
 378 particle stack contained 93.295 particles and was NU refined to 3.92  $\text{\AA}$  with C2 symmetry  
 379 (4.07  $\text{\AA}$  with C1 symmetry). The map was sharpened with the Guinier plot B-factor of -200  $\text{\AA}$   
 380 <sup>2</sup>. Fourier Shell Correlation plot is indicated as well as local resolutions at FSC=0.5 projected  
 381 on the final map. A histogram with the full local resolution range is also indicated. The first  
 382 high resolution 3D structure was used as an input for CryoSPARC's 3D variability jobtype  
 383 with 6 modes. Only the first three modes showed global changes; firstly, translation of MlaD  
 384 against MlaBEF (Supplemental Movie 1), secondly, rotation of the MlaBEF part against MlaD  
 385 (Supplemental Movie 2) and thirdly, alternating appearance of MlaB, indicating lower  
 386 occupancy of this part compared to the MlaDEF part.

387

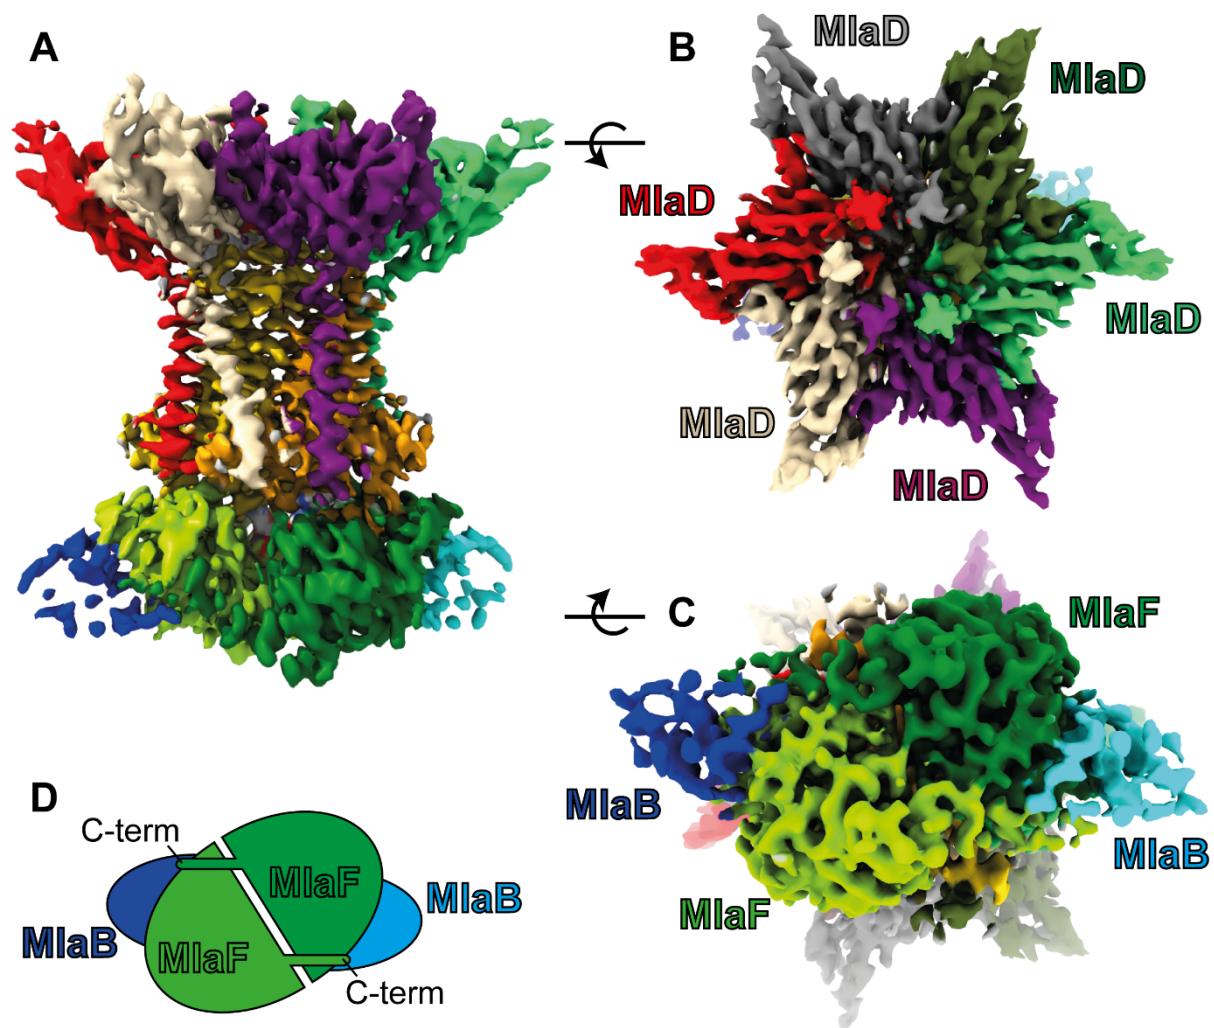

388

389 **Supplemental Figure 2:** Side (A), top (B) and bottom (C) views of MlaBDEF. The MlaBFFB  
 390 tetramer is stabilized by a “handshake mechanism” (D). C-terminal regions of MlaF bind the  
 391 opposing MlaB subunit.

392

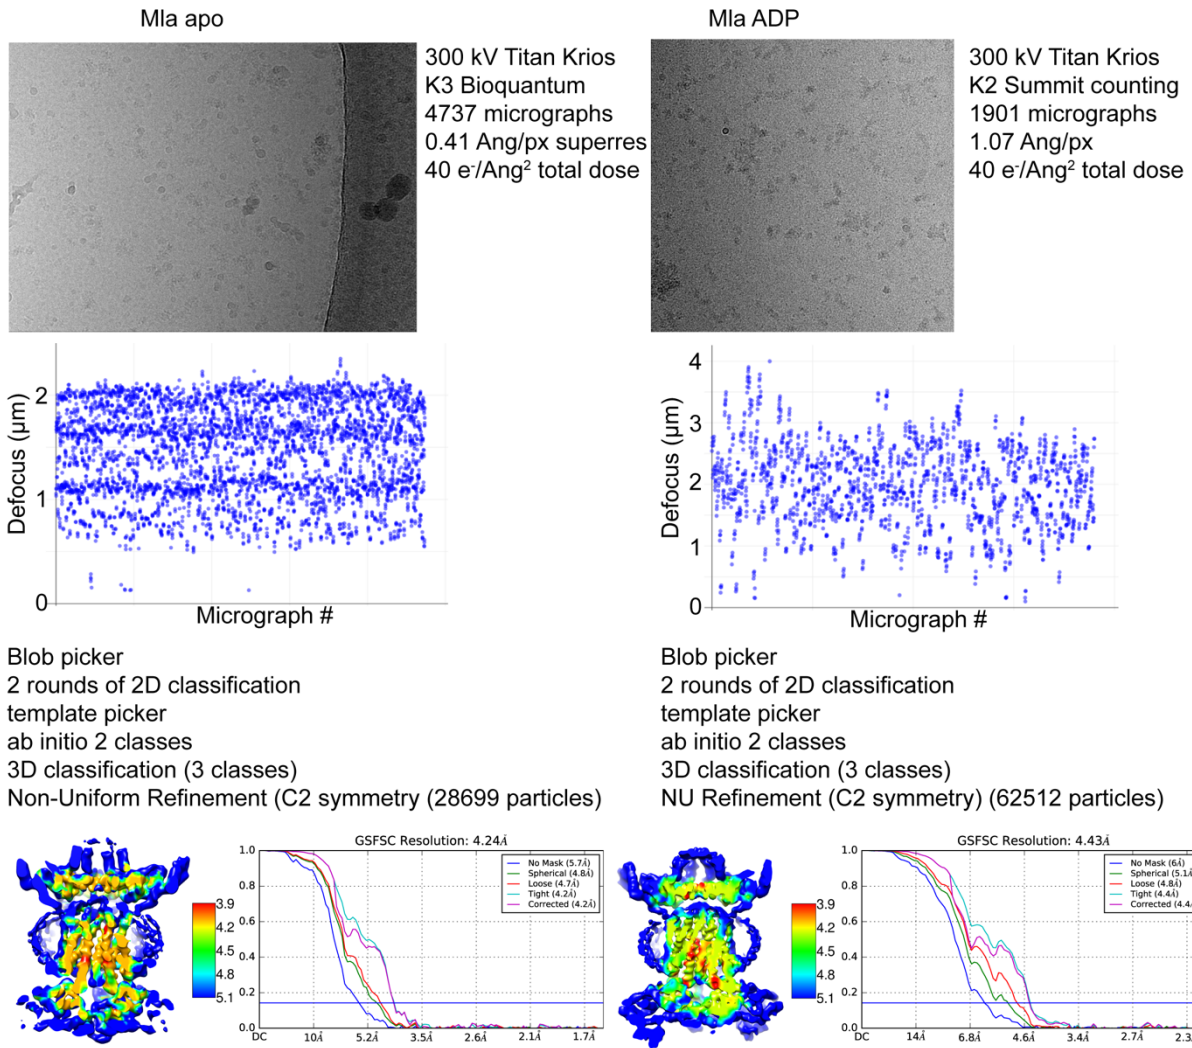

393

394 **Supplemental Figure 3:** processing of the MlaBDEF-ADP and MlaBDEF apo datasets in  
 395 After blob picking and 2D classification selected 2D classes were used for template picking.  
 396 After several rounds of ab initio 3D structure generation and 3D classification Non-uniform  
 397 refinement in C2 symmetry resulted in slightly lower resolutions compared to MlaBDEF-  
 398 AppNHp. Global and local CTF refinement did not increase the map resolution.

399

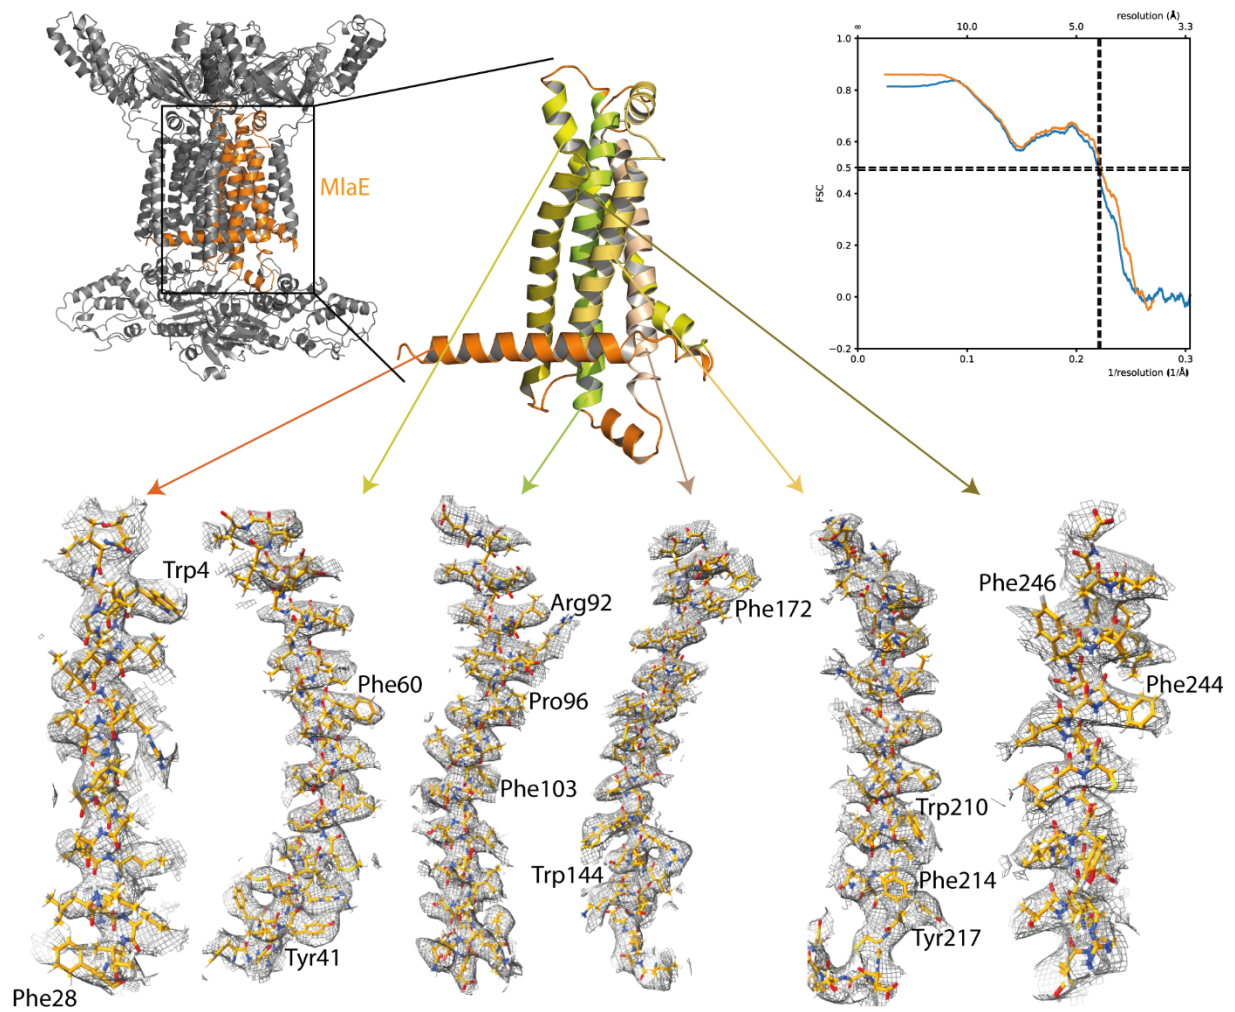

400

401 **Supplemental Figure 4:** de novo model building of MlaE (orange). Large side chains that  
 402 allowed sequence mapping are indicated as well as map to model FSC of the whole  
 403 MlaBDEF protein complex to the AppNHp map.

404

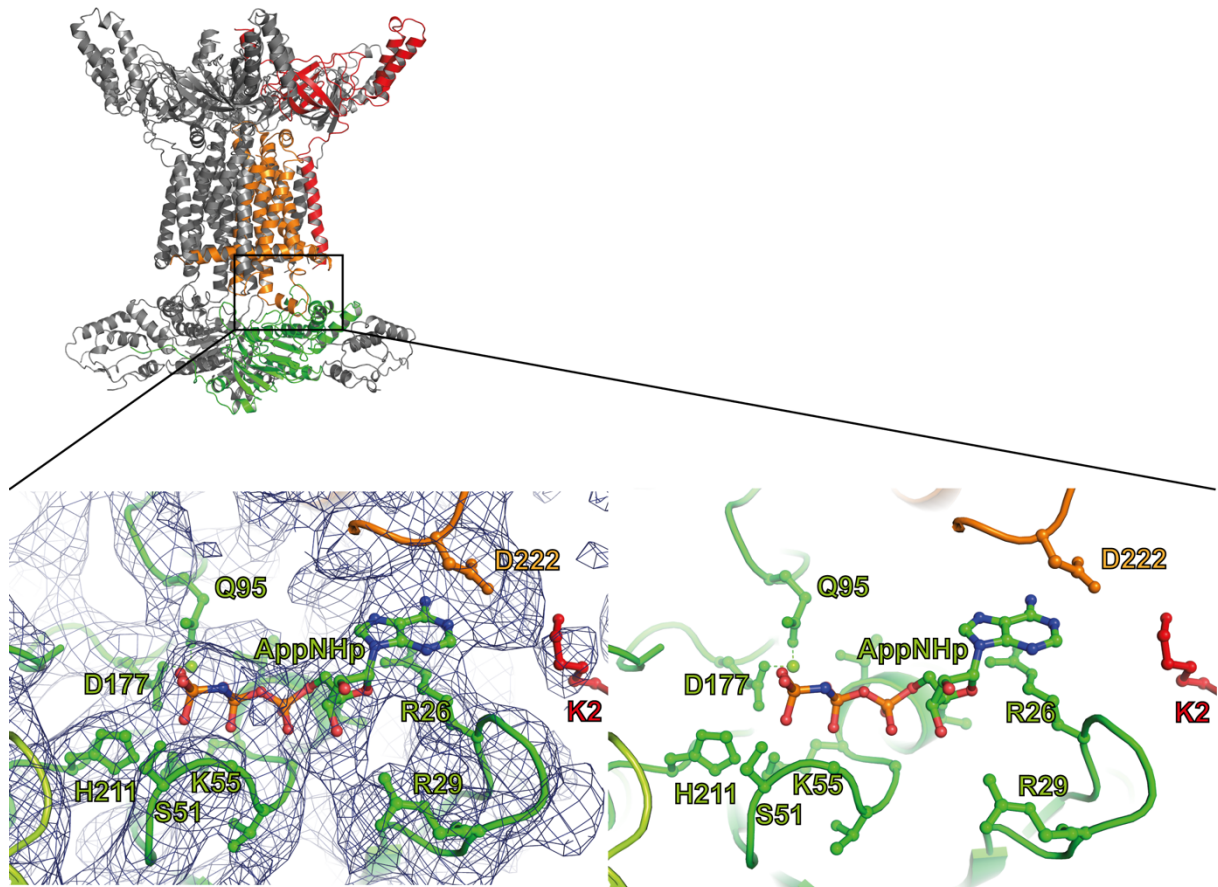

405

406 **Supplemental Figure 5:** AppNhp is bound at the interface of MlaE (orange), MlaD (red) and  
407 MlaF (green).

408

409

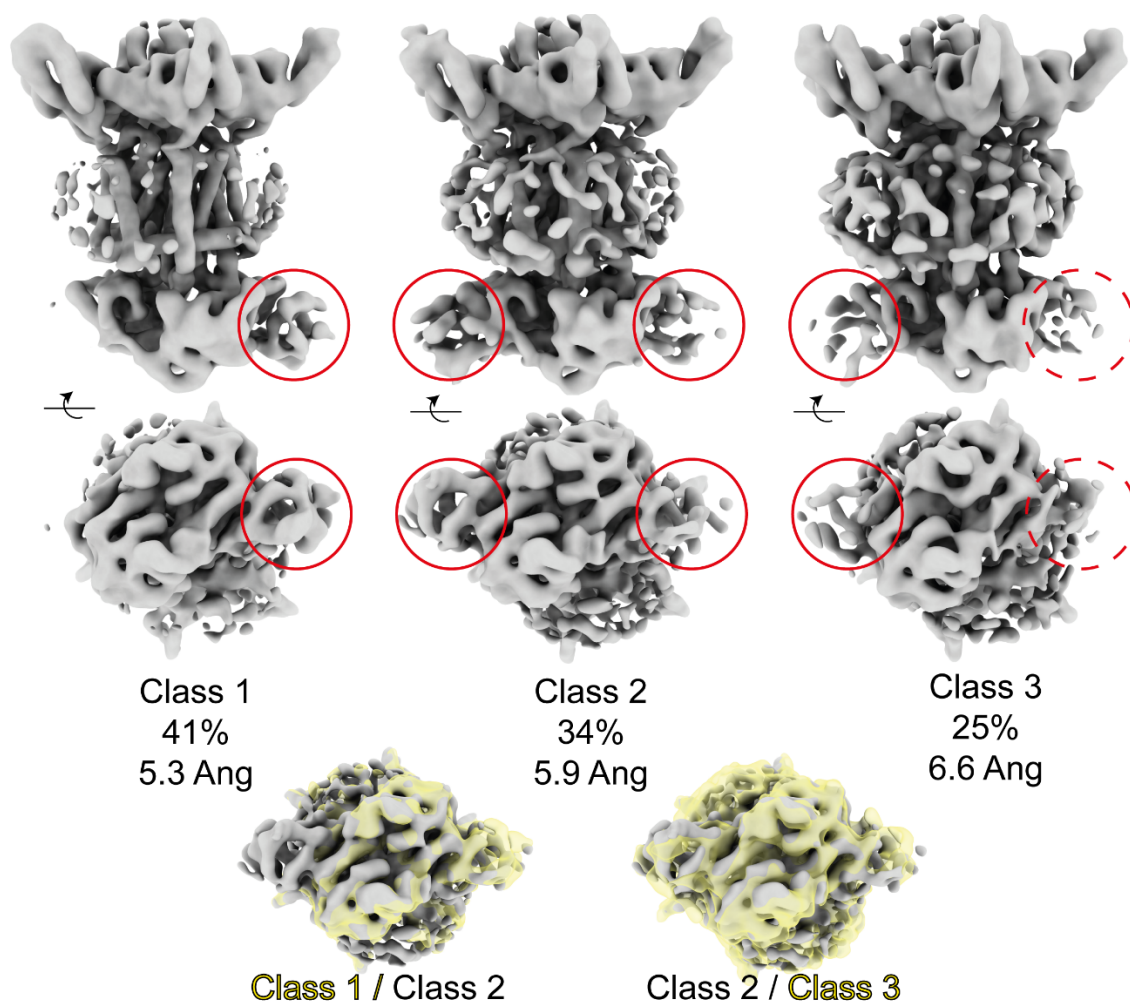

410

411 **Supplemental Figure 6:** MlaB binding (red circles) occurred on both binding sites in about  
 412 50% of the particles (classes 2 and 3) and on only one binding site in the other 50% of the  
 413 particles (class 1). Maps were obtained by Non-Uniform refinement in C1 symmetry after  
 414 heterogeneous refinement with 3 classes in CryoSPARC. Alignments of Classes 1-3 show  
 415 no major structural changes upon MlaB binding.

416

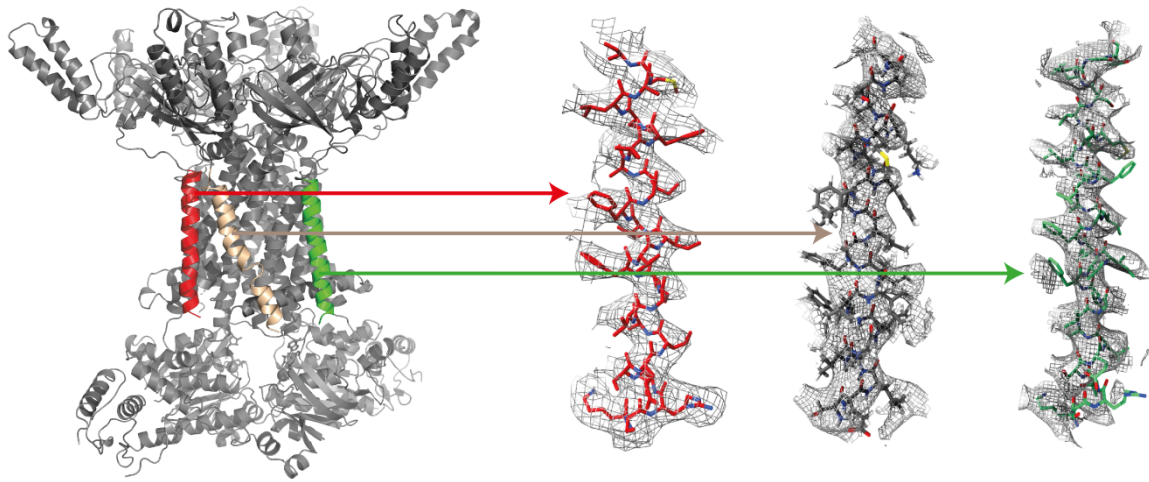

417

418 **Supplemental Figure 7:** Enclosed N-Helix of MlaD is significantly better resolved compared  
419 to peripheral MlaD N-helices (grey, green).

420

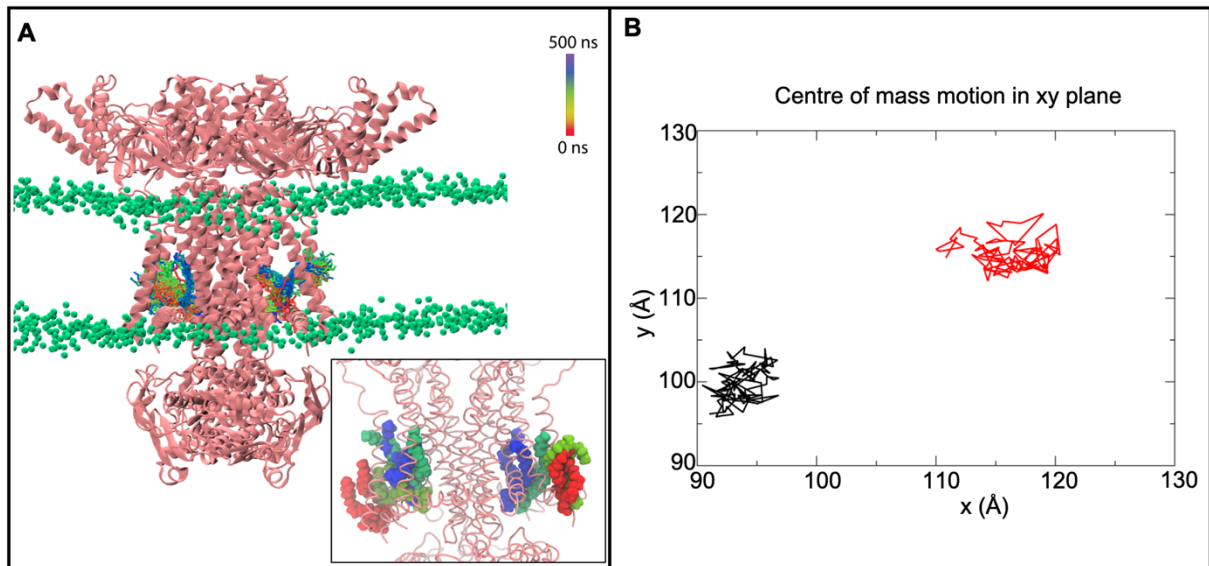

421

422 **Supplemental Figure 8:** Panel A shows the location of two POPE lipids during a 500 ns  
 423 simulation, the colour scheme indicates the movement of the lipids as shown in the legend. In  
 424 this simulation the lipids moved into this location spontaneously during the equilibration  
 425 process, as shown in the close-up view in the inset in which the red coloured lipids indicate  
 426 positions lipid positions at the start of the equilibration process. Panel B shows the motion of  
 427 the lipids in the xy plane over 500 ns. The lipids are confined within an area of 10 x 10 Å for  
 428 500 ns, showing this location is favourable.

429



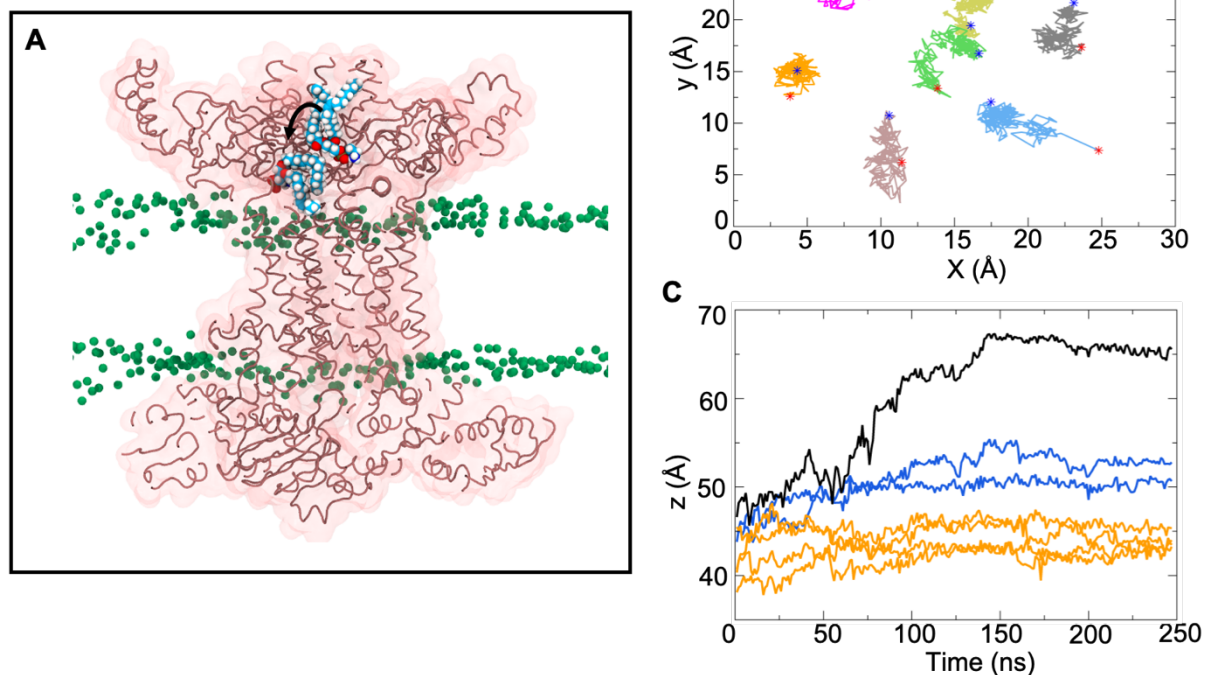

430

431 **Supplemental Figure 9:** Panel A shows a cut-away view of the protein with a POPE lipid at  
 432 two time points during the simulation, time = 0 ns and 150 ns. The Mla<sub>7PE</sub> simulation was  
 433 initiated with seven POPE lipids placed at the periplasmic end of the protein corresponding to  
 434 the density for detergents in the cryo-EM data (Table S2). The lipid which is displaced more  
 435 towards the cytoplasmic end is from the frame at t = 150 ns. The central hydrophobic ‘channel’  
 436 of the protein is a clear conduit for lipids given the spontaneous movement of POPE into this  
 437 region in just 150 ns. Panel B shows the center of mass motion of the seven lipids in the xy  
 438 plane. They are confined to an area of ~5 x 5 Å, indicating this is a high lipid affinity region.  
 439 Panel C shows the center of mass movement of the seven lipids in the Z dimension as a  
 440 function of time. The higher values of z correspond to the cytoplasmic end of the protein. The  
 441 lipid shown in panel A corresponds to the black curve showing a clear movement towards the  
 442 cytoplasmic end. Three other lipids (blue) move into this channel but to a lesser extent than  
 443 the aforementioned lipid, whereas three others (orange) remain close to their starting positions.  
 444 It is important to note that the simulations from a model at the reported resolution do not really  
 445 tell us about the directionality of the movement, but rather that these regions are conduits for  
 446 lipids

447

**Table S1: cryo-EM data collection, refinement and validation statistics**

|                                       | <b>AppNHp</b><br>(EMDB-11082<br>(PDB: 6Z5U)) | <b>Apo</b><br>(EMDB-11083) | <b>ADP</b><br>(EMDB-11084) |
|---------------------------------------|----------------------------------------------|----------------------------|----------------------------|
| <b>Data Collection and Processing</b> |                                              |                            |                            |
| Microscope                            | Titan Krios                                  | Titan Krios                | Titan Krios                |
| Voltage (kV)                          | 300                                          | 300                        | 300                        |
| Camera                                | K2 summit                                    | K3 bioquantum              | K2 summit                  |
| Pixel size (Å)                        | 1.07                                         | 0.41                       | 1.07                       |
| Defocus range (μm)                    | -1 to -2.5                                   | -0.8 to -2.0               | -1 to -2.5                 |
| Total dose (eÅ <sup>-2</sup> )        | 47                                           | 40                         | 40                         |
| Number of micrographs                 | 2557                                         | 4737                       | 1901                       |
| Total particles used                  | 93,295                                       | 28,699                     | 62,512                     |
| Map Resolution (Å)                    | 3.92                                         | 4.24                       | 4.43                       |
|                                       |                                              |                            |                            |
| <b>Refinement</b>                     |                                              |                            |                            |
| Model composition                     |                                              |                            |                            |
| Non-hydrogen atoms                    | 17,892                                       |                            |                            |
| Protein Residues                      | 2334                                         |                            |                            |
| Ligand atoms                          | 4                                            |                            |                            |
| <i>B</i> factors (Å <sup>-1</sup> )   |                                              |                            |                            |
| Protein                               | 145.24                                       |                            |                            |
| Ligand                                | 170.31                                       |                            |                            |
| R.m.s. deviations                     |                                              |                            |                            |
| Bond lengths (Å)                      | 0.008                                        |                            |                            |
| Bond angles (°)                       | 1.384                                        |                            |                            |
| Validation                            |                                              |                            |                            |
| MolProbity score                      | 3.43                                         |                            |                            |
| Clashscore                            | 35.15                                        |                            |                            |
| Poor rotamers (%)                     | 10.94                                        |                            |                            |
| Ramachandran plot                     |                                              |                            |                            |
| Favoured (%)                          | 87.45                                        |                            |                            |
| Allowed (%)                           | 10.94                                        |                            |                            |
| Disallowed (%)                        | 0.43                                         |                            |                            |

451

452

453

454 **Table S2: Equilibrium Protocol for MD simulations**

| Step | Time Step (fs) | Total Time (ns) | Protein Backbone Restraints ( $\text{kJ mol}^{-1} \text{nm}^{-2}$ ) | Protein Sidechain Restraints ( $\text{kJ mol}^{-1} \text{nm}^{-2}$ ) | Ensemble |
|------|----------------|-----------------|---------------------------------------------------------------------|----------------------------------------------------------------------|----------|
| 1    | 1              | 0.125           | 4000                                                                | 2000                                                                 | NVT      |
| 2    | 1              | 0.125           | 2000                                                                | 1000                                                                 | NVT      |
| 3    | 1              | 0.125           | 1000                                                                | 500                                                                  | NPT      |
| 4    | 2              | 0.5             | 500                                                                 | 200                                                                  | NPT      |
| 5    | 2              | 0.5             | 200                                                                 | 50                                                                   | NPT      |
| 6    | 2              | 20              | 50                                                                  | 0                                                                    | NPT      |

455

456

457

458 **Table S3: Summary of the equilibrium MD simulation systems**

| System  | Additional lipids | Temperature (K) | Simulation Length (ns) |
|---------|-------------------|-----------------|------------------------|
| Mla     | -                 | 310             | 500 ( $\times 2$ )     |
| Mla     | -                 | 323             | 500 ( $\times 2$ )     |
| Mla_7PE | 7 POPE            | 310             | 250 ( $\times 2$ )     |

459

460
